# Supplementary material for: Efficacy of Spice Supplementation in Rheumatoid Arthritis: A Systematic Literature Review
Source: MDPI journal article supplement (doi:10.3390/nu12123800), 2020-12-11
Supplement: s1 [file s1]

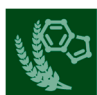

**Table S1.** Quality assessment based on Jadad score of randomized controlled trials reviewed.

| Study                    | Randomization | Blinding | Account of All Patients | Total |
|--------------------------|---------------|----------|-------------------------|-------|
| Moosavian et al. [11,12] | 2             | 2        | 1                       | 5     |
| Chandran et al. [13]     | 2             | 0        | 0                       | 2     |
| Amalraj et al. [14]      | 1             | 1        | 0                       | 2     |
| Aryaeian et al. [13,14]  | 2             | 2        | 0                       | 4     |
| Shishehbor et al. [17]   | 2             | 1        | 1                       | 4     |
| Hamidi et al. [18]       | 2             | 2        | 1                       | 5     |
